# Supplementary material for: Predicting the Drug Safety for Traditional Chinese Medicine through a Comparative Analysis of Withdrawn Drugs Using Pharmacological Network
Source: Evid Based Complement Alternat Med. 2013 Apr 29;2013:256782. doi: 10.1155/2013/256782 (PMC3657406; doi:10.1155/2013/256782)
Supplement: Supplementary file 1 — Table S1: Key network topology property functions planted in Cytoscape and CentiBin. Table S2: Summary for the 66 withdrawn drugs from DrugBank. Table S3: Decisions and side effect records on approved drugs with similarity measurements more than 0.7 to withdrawn ones by same targets. Table S4: Natural Products from the in-house TCM database with similarity values more than 0.7 to withdrawn drugs. [file 256782.f1.pdf]

## Supplemental material

**Table S1. Key network topology property functions planted in Cytoscape and CentiBin.**

| Feature                      | Function                                                                   | Description                                                                                                                                                                           |
|------------------------------|----------------------------------------------------------------------------|---------------------------------------------------------------------------------------------------------------------------------------------------------------------------------------|
| Degree                       | $k_i$                                                                      | The number of links to node i                                                                                                                                                         |
| Clustering coefficient       | $2n_i / [k_i(k_i - 1)]$                                                    | $n_i$ is the number of connected pairs between all neighbors of node i                                                                                                                |
| Neighborhood connectivity    | $c_i$                                                                      | The average number of second neighbors of node i                                                                                                                                      |
| Radiality                    | $\sum_{j \in V} (\Delta G + 1 - \text{dis}(i, j)) / n - 1$                 | $\Delta G$ is the maximal distance amongst all distance calculated between each couple of nodes, $\text{dis}(i, j)$ denotes the length of the shortest path between node i and node j |
| Topological coefficient      | $\text{avg}(J(i, j)) / k_i$                                                | $J(i, j)$ denotes the number of sharing nodes between node i and node j                                                                                                               |
| Eccentricity                 | $1 / \max\{\text{dis}(i, j) : j \in V\}$                                   | The longest shortest path of node i.                                                                                                                                                  |
| Stress                       | $\sum_{s \neq i \in V} \sum_{t \neq i \in V} \sigma_{st}(i)$               | $\sigma_{st}(i)$ denotes the number of shortest paths from s to t that i lies on.                                                                                                     |
| Betweenness centrality       | $\sum_{s \neq i \in V} \sum_{t \neq i \in V} \sigma_{st}(i) / \sigma_{st}$ | $\sigma_{st}$ denotes the number of shortest paths from s to t                                                                                                                        |
| Closeness centrality         | $1 / \text{avg}(\text{dis}(i, j))$                                         | $\text{dis}(i, j)$ denotes the length of the shortest path between node i and node j                                                                                                  |
| Average shortest path length | $d_i$                                                                      | The shortest path of node i                                                                                                                                                           |

**Table S2. Summary for the 66 withdrawn drugs from DrugBank.**

| Accession Number | Therapy areas                                                                                                 | Withdrawal reasons | Withdrawal date |
|------------------|---------------------------------------------------------------------------------------------------------------|--------------------|-----------------|
| <b>DB00197</b>   | antihyperglycemic, treatment of Type II diabetes mellitus                                                     | Hepatotoxicity     | 2000            |
| <b>DB00323</b>   | potent, selective, and reversible inhibitor of catechol-O-methyltransferase, treatment of Parkinson's disease | Hepatotoxicity     | 1998 in UK.     |
| <b>DB00342</b>   | H1-receptor antagonist antihistamine,                                                                         | cardiac arrhythmia | in the 1990s in |

|                |                                                                                                                                                                                                |                                                                                                                 |                                 |
|----------------|------------------------------------------------------------------------------------------------------------------------------------------------------------------------------------------------|-----------------------------------------------------------------------------------------------------------------|---------------------------------|
|                | the treatment of allergic rhinitis, hay fever, and allergic skin disorders                                                                                                                     | caused by QT interval prolongation                                                                              | the USA                         |
| <b>DB00365</b> | antibacterial, treatment of adults with mild to moderate infections                                                                                                                            | cardiac events and sudden death, due to its side effect of lengthening the QT interval on the electrocardiogram | 1999 in USA                     |
| <b>DB00397</b> | a sympathomimetic agent, the treatment of nasal congestion, control of urinary incontinence, priapism and obesity                                                                              | hemorrhagic stroke                                                                                              | May 31, 2001 in Canada          |
| <b>DB00407</b> | anticoagulant, prevention of deep vein thrombosis                                                                                                                                              | excessive bleeding and bruising                                                                                 | March 2000 in the USA           |
| <b>DB00409</b> | antipsychotic, the treatment of schizophrenia                                                                                                                                                  | incidence of aplastic anemia                                                                                    | 1993 in UK                      |
| <b>DB00439</b> | Anticholesteremic, treatment of hypercholesterolemia and mixed dyslipidemia                                                                                                                    | Rhabdomyolysis,                                                                                                 | August 8, 2001 in Canada        |
| <b>DB00533</b> | anti-inflammatory, the treatment of osteoarthritis, rheumatoid arthritis, acute pain in adults, and primary dysmenorrhea, as well as acute treatment of migraine attacks with or without auras | increased risk of heart attack and stroke associated with long-term, high-dosage use                            | September 30, 2004 in USA       |
| <b>DB00574</b> | the management of exogenous obesity, Anorexigenic agent                                                                                                                                        | heart valve disease and pulmonary hypertension; cardiac fibrosis                                                | 1997 in USA                     |
| <b>DB00580</b> | anti-inflammatory, the treatment of osteoarthritis and dysmenorrhoea                                                                                                                           | possible increased risk of heart attack and stroke                                                              | in 2005 in Canana, USA and EUro |
| <b>DB00604</b> | treatment of adult patients with nocturnal heartburn due to gastroesophageal reflux disease                                                                                                    | arrhythmias, long QT syndrome                                                                                   | 28 July, 2000 in UK             |
| <b>DB00637</b> | the treatment of allergy symptoms                                                                                                                                                              | cause arrhythmias at high doses, especially when taken with CYP inhibitors or grapefruit juice                  | 1999                            |
| <b>DB00664</b> | Anti-Infective, used for respiratory and urinary tract infections and also for malaria                                                                                                         | Agranulocytosis and anaemia                                                                                     | March 2000                      |
| <b>DB00761</b> | the treatment of hypokalemia                                                                                                                                                                   | hyperkalemia, Late                                                                                              |                                 |

|                |                                                                                                                        |                                                                                                                                                                                                                                                                                                                                     |                                                     |
|----------------|------------------------------------------------------------------------------------------------------------------------|-------------------------------------------------------------------------------------------------------------------------------------------------------------------------------------------------------------------------------------------------------------------------------------------------------------------------------------|-----------------------------------------------------|
|                |                                                                                                                        | manifestations include muscle paralysis and cardiovascular collapse from cardiac arrest                                                                                                                                                                                                                                             |                                                     |
| <b>DB00897</b> | Anti-anxiety, the short-term treatment of insomnia                                                                     | risk of psychiatric adverse drug reactions.                                                                                                                                                                                                                                                                                         | withdrawn in UK                                     |
| <b>DB00901</b> | the treatment of asthma and COPD                                                                                       | problems with dependence and abuse                                                                                                                                                                                                                                                                                                  | in 2001 in USA                                      |
| <b>DB00914</b> | the treatment of type II diabetes mellitus                                                                             | high incidence of lactic acidosis                                                                                                                                                                                                                                                                                                   | in 1977 in USA                                      |
| <b>DB00926</b> | treat severe psoriasis; now used to treat T-cell lymphomas                                                             | the high risk of birth defects                                                                                                                                                                                                                                                                                                      | in 1998 in USA                                      |
| <b>DB00969</b> | the treatment of symptoms of severe diarrhea-predominant irritable bowel syndrome (IBS) in women with chronic symptoms | adverse effects including ischemic colitis, severely obstructed or ruptured bowel, and death                                                                                                                                                                                                                                        | in November 2000 in USA                             |
| <b>DB01041</b> | the acute treatment of the cutaneous manifestations of moderate to severe erythema nodosum leprosum (ENL)              | teratogenic effects                                                                                                                                                                                                                                                                                                                 | in 1961 in USA                                      |
| <b>DB01079</b> | treatment of women with irritable bowel syndrome (IBS)                                                                 | risks of heart attack or stroke                                                                                                                                                                                                                                                                                                     | On March 30, 2007 in USA                            |
| <b>DB01105</b> | the treatment of obesity                                                                                               | the risk of heart attack and stroke in patients with a history of heart disease                                                                                                                                                                                                                                                     | In October 2010 in USA and Canada                   |
| <b>DB01107</b> | treating insomnia,                                                                                                     | Side effects can include: Skin rash, fever, depression, ulcers or sores in mouth or throat, unusual bleeding or bruising, confusion, fast heartbeat, respiratory depression, swelling of feet or lower legs, dizziness, drowsiness, headache, double vision, clumsiness, constipation, diarrhea, nausea, vomiting, unusual weakness | in June 1965 in USA and in September 1990 in Canada |

|                |                                                                                                                                           |                                                                                                                                                                          |                             |
|----------------|-------------------------------------------------------------------------------------------------------------------------------------------|--------------------------------------------------------------------------------------------------------------------------------------------------------------------------|-----------------------------|
| <b>DB01108</b> | the treatment of Cushing's syndrome                                                                                                       | darkening of skin, drowsiness or tiredness, loss of appetite, mental depression, skin rash, and/or vomiting                                                              | in April 1994 in USA        |
| <b>DB01149</b> | the treatment of depression                                                                                                               | the small possibility of hepatic (liver) injury                                                                                                                          | On May 20, 2004 in USA      |
| <b>DB01178</b> | Used in the management of anxiety and in the treatment of muscle spasm.                                                                   | confirmed serious and rare cutaneous reactions (toxic epidermal necrolysis)                                                                                              | in 1996                     |
| <b>DB01186</b> | the treatment of Parkinson's Disease                                                                                                      | the risk of cardiac valvulopathy                                                                                                                                         | in 2007 in USA and Canada   |
| <b>DB01191</b> | Antiobesity, the management of obesity                                                                                                    | cardiovascular side-effects                                                                                                                                              | in 1997 in USA              |
| <b>DB01228</b> | management of irregular heartbeats                                                                                                        | frequent proarrhythmic side effects                                                                                                                                      | on December 16, 1991 in USA |
| <b>DB01230</b> | treatment of Attention Deficit Hyperactivity Disorder                                                                                     | Side effects include insomnia, anorexia, stomach ache, skin rashes, increased irritability, mild depression, nausea, dizziness, headache, drowsiness, and hallucinations | In March 2005 in USA        |
| <b>DB01388</b> | the treatment of angina and high blood pressure                                                                                           | potentially harmful interactions with other drugs                                                                                                                        | in 1998                     |
| <b>DB01405</b> | Anti-Bacterial, the treatment of lower respiratory tract infections, genital and urinary infections like prostatitis, and skin infections | temafloxacin syndrome-- hemolysis                                                                                                                                        | in USA in 1992              |
| <b>DB01424</b> | anti-inflammatory, and antipyretic properties                                                                                             | risk of agranulocytosis                                                                                                                                                  | in 1999                     |
| <b>DB01463</b> | the treatment of depressive fatigue                                                                                                       | due to problems with dependence and abuse                                                                                                                                |                             |
| <b>DB01556</b> | Used as an appetite suppressant                                                                                                           | pulmonary hypertension and cardiac fibrosis                                                                                                                              |                             |
| <b>DB03585</b> |                                                                                                                                           | bone marrow suppression                                                                                                                                                  | in March, 1985 in Canada    |

|                |                                                                                                   |                                                     |                                                         |
|----------------|---------------------------------------------------------------------------------------------------|-----------------------------------------------------|---------------------------------------------------------|
| <b>DB03783</b> | analgesic, NSAID and fever reducer                                                                | nephropathy (damage to or disease of the kidney)    | in June 1973 in Canada                                  |
| <b>DB04812</b> | Dermatologic Agent                                                                                | cholestatic jaundic                                 | on August 5, 1982                                       |
| <b>DB04813</b> | Anti-Infective Agent                                                                              | serious skin disorders                              | on October 24, 1967                                     |
| <b>DB04814</b> |                                                                                                   | nephropathy                                         | in 1963, in Canada, USA and UK                          |
| <b>DB04815</b> | used as a topical antifungal treatment, a broad-spectrum antibacterial with antifungal properties | neurotoxicity                                       | in 1983                                                 |
| <b>DB04816</b> | Cathartics                                                                                        | genotoxicity                                        | Withdrawn from the Canadian, US, and UK markets in 1998 |
| <b>DB04817</b> | used a powerful painkiller and fever reducer; NSAID                                               | potentially fatal agranulocytosis                   | on June 27, 1977                                        |
| <b>DB04818</b> | the treatment of depression (originally intended to treat tuberculosis)                           | interactions with food products containing tyrosine | in July 1964 in Canada                                  |
| <b>DB04819</b> | a antihistamine and anticholinergic drug                                                          | carcinogen                                          | in May and June 1979                                    |
| <b>DB04820</b> | MAOI (monoamine oxidase inhibitor) antidepressants                                                | interactions with food products containing tyrosine | in 1963 in Canada, USA and UK                           |
| <b>DB04821</b> | dopamine reuptake inhibitor                                                                       | increased incidence of hemolytic anemia             | on March 20, 1992 in USA and Canada, UK                 |
| <b>DB04822</b> | treat all types of cough of various etiologies                                                    | carcinogenicity                                     | in 1976 in Canada, USA and UK                           |
| <b>DB04823</b> | laxative                                                                                          | jaundice                                            | in 1970s                                                |
| <b>DB04824</b> | laxative                                                                                          | carcinogenicity                                     | in 1997 in Canada                                       |
| <b>DB04825</b> | Vasodilator Agent, treat angina pectoris                                                          | cardiac arrhythmias                                 | in 1988 in Canada, USA and UK                           |
| <b>DB04826</b> | an antihistamine with anticholinergic properties used as an antipruritic                          | neutropenia                                         | in 1963 in Canada, USA and UK                           |

|                |                                                                                                           |                                                                                                                                                              |                                     |
|----------------|-----------------------------------------------------------------------------------------------------------|--------------------------------------------------------------------------------------------------------------------------------------------------------------|-------------------------------------|
| <b>DB04827</b> | Antineoplastic Agent                                                                                      | carcinogenic                                                                                                                                                 | in 1963 in Canada, USA and UK       |
| <b>DB04828</b> | the management of mild to severe pain.                                                                    | fatal and near-fatal anaphylactoid reactions                                                                                                                 | in March 1983 in Canada, USA and UK |
| <b>DB04829</b> | an agent in psychedelic therapy,                                                                          | withdrawn after it became widely used recreationally                                                                                                         | in 1950s-1960s                      |
| <b>DB04830</b> | anti-diabetic drug                                                                                        | lactic acidosis                                                                                                                                              | in 1978                             |
| <b>DB04831</b> | treatment of hypertension                                                                                 | hepatitis                                                                                                                                                    | in 1982                             |
| <b>DB04832</b> | the treatment of depression                                                                               | risk of Guillain-Barré syndrome                                                                                                                              | in 1983                             |
| <b>DB04833</b> | sedative-hypnotic drug, the treatment of insomnia, and as a sedative and muscle relaxant                  | Withdrawn because of risk of addiction and overdose                                                                                                          | in 1984                             |
| <b>DB04834</b> | Used in anaesthesia, to aid and enable endotracheal intubation                                            | fatal bronchospasm                                                                                                                                           | in 2001 in many countries           |
| <b>DB04836</b> | the treatment of depression                                                                               | hepatotoxicity, dermatological side effects, and abuse potential.                                                                                            | in 1999                             |
| <b>DB04898</b> | anticoagulant, the treatment of acute deep vein thrombosis                                                | hepatotoxicity (liver damage)                                                                                                                                | in 2006                             |
| <b>DB06144</b> | antipsychotic, the treatment of schizophrenia                                                             | numerous cardiac adverse effects                                                                                                                             | in 1998                             |
| <b>DB06804</b> | used as a vaginal spermicide, contraception                                                               | a higher incidence of vaginal lesions, increase the risk of infection with sexually transmitted human papillomaviruses (HPVs) that can cause cervical cancer |                                     |
| <b>DB06810</b> | the treatment of testicular cancer, Paget's disease of bone, and, rarely, the management of hypercalcemia | a dose-related bleeding syndrom                                                                                                                              | in 2000                             |

**Table S3. Decisions and side effect records on approved drugs with similarity measurements more than 0.7 to withdrawn ones by same targets.**

| <b>Withdrawn Drugs<sup>a</sup></b> | <b>Similar approved drugs by the same target<sup>b</sup></b> | <b>Side effect records<sup>c</sup></b>                |
|------------------------------------|--------------------------------------------------------------|-------------------------------------------------------|
| wd_DB00197, hepatotoxicity         | app_DB00412, withdrawn in Euro, 2010, 9 and in New           | Rosiglitazone, respiratory tract infection, 7.3%-9.9% |

|                                   |                                                                                                                                      |                                             |
|-----------------------------------|--------------------------------------------------------------------------------------------------------------------------------------|---------------------------------------------|
|                                   | Zealand in 2011, 4 for heart disease risks, but in USA is still allowed                                                              |                                             |
|                                   | app_DB01132, withdrawn in some countries in 2011,7, for an increased risk of bladder tumors                                          | Pioglitazone, disease progression, 13.4%    |
| wd_DB00342,<br>cardiac arrhythmia | app_DB00376,                                                                                                                         | Trihexyphenidyl, no records                 |
|                                   | app_DB00387,                                                                                                                         | Procyclidine, no records                    |
|                                   | app_DB00505, many patients discontinued it for unwanted side effects.                                                                | Tridihexethyl, no records                   |
|                                   | app_DB00950, adverse cardiac events including cardiac arrhythmias, discontinued only in France in 2004                               | Fexofenadine, vomiting, 4.2%-12%            |
|                                   | app_DB01146,                                                                                                                         | Diphenylpyraline, no records                |
|                                   | app_DB01231, currently not marketed in USA or Canada                                                                                 | Diphenidol, no records                      |
| wd_DB00365,<br>cardiac arrhythmia | app_DB00218, FDA has issued many warnings about the adverse effects. last resort, discontinued in USA for some therapy areas in 2004 | Moxifloxacin, nervous system disorder, 4.2% |
|                                   | app_DB00467, no longer available in USA                                                                                              | Enoxacin, no records                        |
|                                   | app_DB00487, extensively prescribed in France and not been approved for use in USA.                                                  | Pefloxacin, no records                      |
|                                   | app_DB00537, FDA has issued many warnings about the adverse effects, discontinued in USA for some therapy areas in 2004              | Ciprofloxacin, abdominal pain               |
|                                   | app_DB00685, withdrawn in Euro in 1999 for hepatotoxicity, but available in USA for very restricted indications                      | Trovafloxacin, dizziness, 2%-11%            |
|                                   | app_DB00978, banned in USA in 2008                                                                                                   | Lomefloxacin, acidosis                      |
|                                   | app_DB01044, banned in USA in 2006, in India in 2011                                                                                 | Gatifloxacin, anaphylactic shock            |

|                                    |                                                                                                                                  |                                                     |
|------------------------------------|----------------------------------------------------------------------------------------------------------------------------------|-----------------------------------------------------|
|                                    | app_DB01059, very strict indications, last resort                                                                                | Norfloxacin, arthralgia                             |
|                                    | app_DB01137, FDA has issued many warnings about the adverse effects, discontinued in Singapore, Romania and South Africa in 2011 | Levofloxacin, application site reaction, 0.6%-16.8% |
|                                    | app_DB01155, withdrawn in 2009 in Euro                                                                                           | Gemifloxacin, anaphylactic shock                    |
|                                    | app_DB01165, FDA has issued many warnings about the adverse effects, discontinued only in USA in 2012 for bacterial infection    | Ofloxacin, application site reaction, 0.6%-16.8%    |
|                                    | app_DB01208, banned in USA in 2000                                                                                               | Sparfloxacin, no records                            |
| wd_DB00397,<br>hemorrhagic, stroke | app_DB00368,                                                                                                                     | Norepinephrine, acidosis                            |
|                                    | app_DB00610, discontinued by Manufacturer in 2003 in USA                                                                         | Metaraminol, no records                             |
|                                    | app_DB00852, banned or strict prescription in some countries like Australia                                                      | Pseudoephedrine, anorexia                           |
|                                    | app_DB01364, limited used in USA and UK                                                                                          | Ephedrine, anorexia                                 |
|                                    | app_DB01576, discontinued by GSK, but not withdrawn                                                                              | Dextroamphetamine, abdominal cramps                 |
|                                    | app_DB06707, discontinued in USA                                                                                                 | Levonordefrin, no records                           |
| wd_DB00574,<br>heart valve disease | app_DB01577, scheduled drug in most countries due to its high potential for addiction and abuse, discontinued in USA             | Methamphetamine, constipation                       |
| wd_DB00897,<br>psychiatric         | app_DB00404, discontinued in USA                                                                                                 | Alprazolam, drowsiness, 41%-76.8%                   |
|                                    | app_DB00546, discontinued in USA and Euro                                                                                        | Adinazolam, no records                              |
|                                    | app_DB00683, discontinued by Roche in UK                                                                                         | Midazolam, vomiting, 0.75%-11%                      |
|                                    | app_DB01215, discontinued by Abbott                                                                                              | Estazolam, anxiety, frequent                        |
| wd_DB00901,                        | app_DB00449, discontinued                                                                                                        | Dipivefrin, arrhythmia                              |

|                                              |                                                                                                                                                  |                                                |
|----------------------------------------------|--------------------------------------------------------------------------------------------------------------------------------------------------|------------------------------------------------|
| addiction and abuse                          | app_DB01408,                                                                                                                                     | Bambuterol, no records                         |
| wd_DB00926,<br>birth defects                 | app_DB00459, discontinued<br>for a narrow TI and a long<br>elimination half life                                                                 | Acitretin, abdominal pain                      |
| wd_DB01041,<br>teratogenic effects           | app_DB00480, discontinued in<br>Phase III                                                                                                        | Lenalidomide, angioedema                       |
| wd_DB01107,<br>bleeding depression and vomit | app_DB00237, discontinued                                                                                                                        | Butabarbital, no records                       |
|                                              | app_DB00312, discontinued                                                                                                                        | Pentobarbital, anaemia                         |
|                                              | app_DB01351, discontinued in<br>UK                                                                                                               | Amobarbital, no records                        |
|                                              | app_DB01353, discontinued in<br>UK                                                                                                               | Butethal, no records                           |
| wd_DB01186,<br>heart valve disease           | app_DB00216, only by<br>prescription in USA and<br>Canada                                                                                        | Eletriptan, asthenia, 4%-10%                   |
|                                              | app_DB00248, discontinued in<br>Euro                                                                                                             | Cabergoline, aggression                        |
| wd_DB01191                                   | app_DB01577, scheduled drug<br>in most countries due to its<br>high potential for addiction<br>and abuse, discontinued in<br>USA                 | Methamphetamine,<br>constipation               |
| wd_DB01405,<br>hemolysis                     | app_DB00218, FDA has<br>issued many warnings about<br>the adverse effects. last resort,<br>discontinued in USA for some<br>therapy areas in 2004 | Moxifloxacin, nervous system<br>disorder, 4.2% |
|                                              | app_DB00467, no longer<br>available in USA                                                                                                       | Enoxacin, no records                           |
|                                              | app_DB00487, extensively<br>prescribed in France and not<br>been approved for use in USA.<br>last resort                                         | Pefloxacin, no records                         |
|                                              | app_DB00537, FDA has<br>issued many warnings about<br>the adverse effects,<br>discontinued in USA for some<br>therapy areas in 2004              | Ciprofloxacin, abdominal pain                  |
|                                              | app_DB00685, withdrawn in<br>Euro in 1999 for<br>hepatotoxicity, but available in<br>USA for very restricted<br>indications                      | Trovafloxacin, dizziness,<br>2%-11%            |
|                                              | app_DB00978, banned in USA                                                                                                                       | Lomefloxacin, acidosis                         |

|                                    |                                                                                                                                  |                                                     |
|------------------------------------|----------------------------------------------------------------------------------------------------------------------------------|-----------------------------------------------------|
|                                    | in 2008                                                                                                                          |                                                     |
|                                    | app_DB01044, banned in USA in 2006, in India in 2011                                                                             | Gatifloxacin, anaphylactic shock                    |
|                                    | app_DB01059, very strict indications, last resort                                                                                | Norfloxacin, arthralgia                             |
|                                    | app_DB01137, FDA has issued many warnings about the adverse effects, discontinued in Singapore, Romania and South Africa in 2011 | Levofloxacin, application site reaction, 0.6%-16.8% |
|                                    | app_DB01165, FDA has issued many warnings about the adverse effects, discontinued only in USA in 2012 for bacterial infection    | Ofloxacin, application site reaction, 0.6%-16.8%    |
|                                    | app_DB01208, banned in USA in 2000                                                                                               | Sparfloxacin, no records                            |
| wd_DB01463,<br>addiction and abuse | app_DB00182, used under severe restriction, withdrawn only in Canada in 2005                                                     | Amphetamine, no records                             |
|                                    | app_DB00191,                                                                                                                     | Phentermine, constipation                           |
|                                    | app_DB00865, discontinued but not withdrawn                                                                                      | Benzphetamine, no records                           |
|                                    | app_DB01576, discontinued by GSK, but not withdrawn                                                                              | Dextroamphetamine, abdominal cramps                 |
|                                    | app_DB01577, scheduled drug in most countries due to its high potential for addiction and abuse, discontinued in USA             | Methamphetamine, constipation                       |
| wd_DB03783,<br>nephropathy         | app_DB00316, discontinued                                                                                                        | Acetaminophen, abdominal pain                       |
| wd_DB04817,<br>agranulocytosis     | app_DB01435,                                                                                                                     | Antipyrine, no records                              |
| wd_DB04821,<br>hemolysis           | app_DB06148,                                                                                                                     | Mianserin, no records                               |

<sup>a</sup>The abbreviation of “wd” represents “withdrawn”, and the drug numbers are from the Drugbank database.

<sup>b</sup>The abbreviation of “app” represents “approved”, and the drug numbers are from the Drugbank database.

<sup>c</sup>The side effect event and frequency records are from the SIDER database.

**Table S4. Natural Products from the in-house TCM database with similarity values more**

than 0.7 to withdrawn drugs.

| withdrawn drugs | targets                                                                                                                                                                                                                                                                              | therapy intentions                                                                                              | withdrawn reasons                                                                                                                                     | Compounds from TCM database <sup>a</sup> | Notes                                                         |
|-----------------|--------------------------------------------------------------------------------------------------------------------------------------------------------------------------------------------------------------------------------------------------------------------------------------|-----------------------------------------------------------------------------------------------------------------|-------------------------------------------------------------------------------------------------------------------------------------------------------|------------------------------------------|---------------------------------------------------------------|
| DB04816         | Cytochrome P450 1A2                                                                                                                                                                                                                                                                  | Cathartics                                                                                                      | Withdrawn from the Canadian, US, and UK markets in 1998 due to genotoxicity.                                                                          | NPD41                                    | 3,4-dihydroxyacetophenone                                     |
|                 |                                                                                                                                                                                                                                                                                      |                                                                                                                 |                                                                                                                                                       | NPD44                                    | 2,4-dihydroxyacetophenone                                     |
|                 |                                                                                                                                                                                                                                                                                      |                                                                                                                 |                                                                                                                                                       | NPD90                                    | Phycion                                                       |
|                 |                                                                                                                                                                                                                                                                                      |                                                                                                                 |                                                                                                                                                       | NPD140                                   | 2,6-Dihydroxyacetophenone                                     |
|                 |                                                                                                                                                                                                                                                                                      |                                                                                                                 |                                                                                                                                                       | NPD153                                   | 3,4-Dihydroxyacetophenone                                     |
|                 |                                                                                                                                                                                                                                                                                      |                                                                                                                 |                                                                                                                                                       | NPD330                                   | (+)-6-hydroxy-1-methyl-2,3-dihydro-1H-Indene-4-carboxaldehyde |
|                 |                                                                                                                                                                                                                                                                                      |                                                                                                                 |                                                                                                                                                       | NPD408                                   | Sugiol                                                        |
| DB00926         | Retinoic acid receptor alpha; Retinoic acid receptor RXR-alpha; Retinoic acid receptor beta; Retinoic acid receptor RXR-gamma; Retinoic acid receptor RXR-beta; Retinoic acid receptor gamma-1; Cytochrome P450 19A1; Cytochrome P450 26A1; Cellular retinoic acid-binding protein 1 | to treat severe psoriasis, now used to treat T-cell lymphomas. It also appears to inhibit NADH oxidase activity | It was removed from the United States market in 1998 and the Canadian market in 1996 as a psoriasis medication, due to the high risk of birth defects | NPD882                                   | Difengpin-A                                                   |
| DB04824         | UDP-glucuronosyltransferase 1-9                                                                                                                                                                                                                                                      | Used for over a century as a laxative                                                                           | withdrawn in Canada due to concerns with carcinogenicity in 1997                                                                                      | NPD264                                   | ethyl-4-hydroxybenzoate <sup>b</sup>                          |
|                 |                                                                                                                                                                                                                                                                                      |                                                                                                                 |                                                                                                                                                       | NPD881                                   | Ethyl p-hydroxybenzoate <sup>b</sup>                          |
| DB06804         | Prostaglandin G/H synthase 2                                                                                                                                                                                                                                                         | vaginal spermicide                                                                                              | an increased risk of                                                                                                                                  | NPD283                                   | (-)-Secoisolariciresinol                                      |

|         |     |                                                                                                       |                                  |         |                                                                                   |
|---------|-----|-------------------------------------------------------------------------------------------------------|----------------------------------|---------|-----------------------------------------------------------------------------------|
|         |     |                                                                                                       | opportunistic infections         | NPD291  | 5-O-methylafzelechin                                                              |
|         |     |                                                                                                       |                                  | NPD292  | (-)-afzelechin                                                                    |
|         |     |                                                                                                       |                                  | NPD562  | Secoisolariciresinol <sup>b</sup>                                                 |
|         |     |                                                                                                       |                                  | NPD676  | 1-(4-Hydroxy-3-methoxyphenyl)-2-[2-methoxy-4-(3-hydroxypropyl)phenoxy]-3-propanol |
|         |     |                                                                                                       |                                  | NPD685  | (-)-Epiafzelechin                                                                 |
|         |     |                                                                                                       |                                  | NPD689  | Afzelechin                                                                        |
|         |     |                                                                                                       |                                  | NPD876  | 4,4'-Dihydroxy-3,3'-dimethoxy-9,9'-epoxylignan                                    |
|         |     |                                                                                                       |                                  | NPD1150 | epiafzelechin                                                                     |
|         |     |                                                                                                       |                                  | NPD1159 | secoisolariciresinol <sup>b</sup>                                                 |
|         |     |                                                                                                       |                                  | NPD1395 | Bisphenol A diglycidyl ether                                                      |
|         |     |                                                                                                       |                                  | NPD1625 | 4-(4-hydroxy-3-methoxyphenyl)-2-butanol                                           |
|         |     |                                                                                                       |                                  | NPD1702 | 3-methoxy-8,4'-oxyneolign-3',4,9,9'-tetraol                                       |
|         |     |                                                                                                       |                                  | NPD1871 | 2-[4-(3-hydroxypropyl)-2-methoxyphenoxy]-propan-1,3-diol                          |
| DB06810 | DNA | Treatment of testicular cancer, Paget's disease of bone, and, rarely, the management of hypercalcemia | a dose-related bleeding syndrome | NPD4    | Silibinin                                                                         |
|         |     |                                                                                                       |                                  | NPD2197 | Wistin                                                                            |
|         |     |                                                                                                       |                                  | NPD358  | Myzodendrone                                                                      |
|         |     |                                                                                                       |                                  | NPD203  | (2R,3S)-dihydroxyricetin                                                          |
|         |     |                                                                                                       |                                  | NPD207  | (2R,3S)-taxifolin-3-O-arabinoside                                                 |
|         |     |                                                                                                       |                                  | NPD208  | (2S,3R)-taxifolin-3-O-arabinoside                                                 |

|  |  |  |  |        |                                                                                              |
|--|--|--|--|--------|----------------------------------------------------------------------------------------------|
|  |  |  |  |        | de                                                                                           |
|  |  |  |  | NPD356 | Choerospondin                                                                                |
|  |  |  |  | NPD351 | Narirutin                                                                                    |
|  |  |  |  | NPD295 | neochamaejasmin B                                                                            |
|  |  |  |  | NPD294 | isochamaejasmin                                                                              |
|  |  |  |  | NPD274 | Isonochamaejasmin A                                                                          |
|  |  |  |  | NPD906 | 11-O-vanilloyl bergenin                                                                      |
|  |  |  |  | NPD754 | 3,5,3'-Trihydroxy-7,4'-dimethoxyl-dihydroflavone                                             |
|  |  |  |  | NPD669 | Dihydroquercetin                                                                             |
|  |  |  |  | NPD545 | 4-O- $\alpha$ -L-rhamnopyranosyl-(1 $\rightarrow$ 6)- $\beta$ -D-glucopyranosyl acetophenone |
|  |  |  |  | NPD528 | 4-O- $\beta$ -D-glucopyranoside-acetophenone                                                 |
|  |  |  |  | NPD464 | Prunin                                                                                       |
|  |  |  |  | NPD448 | ormocarpin                                                                                   |
|  |  |  |  | NPD447 | Pyrroside B                                                                                  |
|  |  |  |  | NPD445 | Hemiphloin                                                                                   |
|  |  |  |  | NPD362 | Scolymoside                                                                                  |
|  |  |  |  | NPD905 | 11-O-(4'-O-methylgalloyl)-bergenin                                                           |
|  |  |  |  | NPD838 | taxifolin                                                                                    |
|  |  |  |  | NPD818 | L-Picein                                                                                     |
|  |  |  |  | NPD763 | Davidioside                                                                                  |
|  |  |  |  | NPD756 | 3,5,7,3'-tetrahydroxy-4'-methoxyl-dihydroflavone                                             |
|  |  |  |  | NPD907 | 11-O-(4'-hydroxybenzoyl)-bergenin                                                            |

|  |  |  |  |         |                                                                                                                                                             |
|--|--|--|--|---------|-------------------------------------------------------------------------------------------------------------------------------------------------------------|
|  |  |  |  | NPD908  | bergenin                                                                                                                                                    |
|  |  |  |  | NPD1066 | matairesinoside                                                                                                                                             |
|  |  |  |  | NPD1119 | 7-methoxy neo<br>chamaejasmin<br>A                                                                                                                          |
|  |  |  |  | NPD1126 | 7-methoxy neo<br>chamaejasmin<br>B                                                                                                                          |
|  |  |  |  | NPD1149 | 2,2'-bisteppoge<br>nin-7-O- $\beta$ -gluc<br>opyranoside                                                                                                    |
|  |  |  |  | NPD1334 | Osmanthuside<br>G                                                                                                                                           |
|  |  |  |  | NPD1696 | Dihydrosyringi<br>n <sup>b</sup>                                                                                                                            |
|  |  |  |  | NPD1335 | Dihydrosyringi<br>n <sup>b</sup>                                                                                                                            |
|  |  |  |  | NPD1697 | Pallasiin                                                                                                                                                   |
|  |  |  |  | NPD1708 | Cynanoneside<br>A                                                                                                                                           |
|  |  |  |  | NPD1750 | Gaultheroside<br>A                                                                                                                                          |
|  |  |  |  | NPD1757 | Gaultheroside<br>G                                                                                                                                          |
|  |  |  |  | NPD1758 | dihydrodehydro<br>diconiferylalco<br>hol-9-O-b-D-ox<br>ylopyranoside                                                                                        |
|  |  |  |  | NPD1940 | 1-(4-((2S,3S,4<br>R,5S)-tetrahydr<br>o-3,4,5-trihydro<br>xy-6-(hydroxy<br>methyl)-2H-pyr<br>an-2-yloxy)phe<br>nyl)ethanone                                  |
|  |  |  |  | NPD2061 | 1-(4'-hydroxy-<br>3'-methoxyphe<br>nyl)-2-[4''-(3-h<br>ydroxypropyl)-<br>2''-hydroxyphe<br>noxy]-1,3-prop<br>andiol-4'-O- $\beta$ -<br>D-xylopyranosi<br>de |

|  |  |  |  |         |                                                                                                                                                         |
|--|--|--|--|---------|---------------------------------------------------------------------------------------------------------------------------------------------------------|
|  |  |  |  | NPD1999 | $\beta$ -D-Glucopyranoside-4-phenylbutan-2-one                                                                                                          |
|  |  |  |  | NPD2141 | (+)-lyoniresinol-3 $\alpha$ -O- $\beta$ -D-glucopyranoside                                                                                              |
|  |  |  |  | NPD2140 | (-)-lyoniresinol-3 $\alpha$ -O-9-O-(6'-3,5-dimethoxy-4-hydroxybenzoyl)- $\beta$ -D-glucopyranoside                                                      |
|  |  |  |  | NPD2139 | (+)-lyoniresinol-3 $\alpha$ -O- $\beta$ -D-glucopyranoside                                                                                              |
|  |  |  |  | NPD2105 | Junipetrioloside A                                                                                                                                      |
|  |  |  |  | NPD2074 | 1-(4'-hydroxy-3'-methoxyphenyl)-2-[4''-(3-hydroxypropyl)-2''-hydroxyphenoxy]-1,3-propanediol-4''c-O- $\alpha$ -L-rhamnoside                             |
|  |  |  |  | NPD2071 | 1-(4'-hydroxy-3'-methoxyphenyl)-2-[4''-(3-hydroxypropyl)-2''-methoxyphenoxy]-1,3-propanediol-4''c-O- $\alpha$ -L-rhamnoside                             |
|  |  |  |  | NPD2069 | 1-(4'-hydroxy-3'-methoxyphenyl)-2-[4''-(3-hydroxypropyl)-2''-hydroxyphenoxy]-1,3-propanediol-4'-O- $\alpha$ -L-rhamno-2''-O- $\beta$ -D-glucopyranoside |

|  |  |  |  |         |                                                                                                                                                    |
|--|--|--|--|---------|----------------------------------------------------------------------------------------------------------------------------------------------------|
|  |  |  |  | NPD2068 | Styraxlignolide<br>D                                                                                                                               |
|  |  |  |  | NPD2065 | 1-(4'-hydroxy-3'-methoxyphenyl)-2-[2''-hydroxy-4''-(3-hydroxypropyl)phenoxy]-3-propanol-3-O- $\alpha$ -L-rhamno-4''c- O- $\beta$ -D-xylopyranoside |

<sup>a</sup> The “NPD” is the abbreviation of “Natural product database”, and the accession numbers are from the in-house TCM database as well.

<sup>b</sup> They were extracted from different herbal sources.
